# Supplementary material
Source: Research Square preprint supplement (doi:10.21203/rs.3.rs-9149878/v1)
Supplement: Supplementary file 1 [file ac26f0552aba627af72ccd4d.docx]

**Table S1 Calibration of joint angle**

| **Joint Angle** | **Side 1** | **Vertex** | **Side 2** |
| --- | --- | --- | --- |
| **Neck** | Line connecting the greater trochanter of the femur and the spinous process of the seventh cervical vertebra | Spinous process of the seventh cervical vertebra | Line connecting the spinous processes from the first cervical vertebra to the seventh cervical vertebra |
| **Trunk** | Vertical line from the greater trochanter of the femur to the ground plane | The greater trochanter of the femur | Line connecting the greater trochanter of the femur and the spinous process of the seventh cervical vertebra |
| **Upper Arm** | Parallel line to the line connecting the greater trochanter of the femur and the spinous process of the seventh cervical vertebra | Acromion | Line connecting the acromion and the elbow point |
| **Lower Arm** | Line connecting the acromion and the elbow point | The elbow point | Line connecting the elbow point and the styloid process of the ulna/radius |
| **Hand/Wrist** | Line connecting the elbow point and the styloid process of the ulna/radius | The styloid process of the ulna/radius | Palmar Line |
| **Knee** | Line connecting the greater trochanter of the femur and the patella | The patella | Line connecting the patella and the lateral malleolus |

**Table S2 The prevalence of WMSDs among various construction workers [Number (Prevalence, %)]**

| **Job type** | **Number** | **Overall** | **Neck** | **Shoulder** | **Upper back** | **Elbow** | **Lower back** | **Hand/Wrist** | **Thigh/Leg** | **Knee** | **Angle/**  **Foot** |
| --- | --- | --- | --- | --- | --- | --- | --- | --- | --- | --- | --- |
| **General Laborer** | 3014 | 817  (27.1) | 301  (10.0) | 363  (12.0) | 200  (6.6) | 120  (4.0) | 297  (9.9) | 276  (9.2) | 276  (9.2) | 195  (6.5) | 375  (12.4) |
| **Rebar Worker** | 1749 | 481  (27.5) | 151  (8.6) | 179  (10.2) | 123  (7.0) | 80  (4.6) | 160  (9.1) | 188  (10.7) | 161  (9.2) | 104  (5.9) | 165  (9.4) |
| **Carpenter** | 1591 | 453  (28.5) | 154  (9.7) | 152  (9.6) | 93  (5.8) | 68  (4.3) | 165  (10.4) | 157  (9.9) | 160  (10.1) | 124  (7.8) | 140  (8.8) |
| **Scaffolder** | 898 | 201  (22.4) | 71  (7.9) | 69  (7.7) | 42  (4.7) | 28  (3.1) | 68  (7.6) | 80  (8.9) | 54  (6.0) | 27  (3.0) | 74  (8.2) |
| **Roofer** | 795 | 266  (33.5) | 107  (13.5) | 94  (11.8) | 55  (6.9) | 35  (4.4) | 107  (13.5) | 80  (10.1) | 92  (11.6) | 65  (8.2) | 96  (12.1) |
| **Welder** | 776 | 271  (34.9) | 123  (15.9) | 107  (13.8) | 68  (8.8) | 31  (4.0) | 119  (15.3) | 66  (8.5) | 72  (9.3) | 66  (8.5) | 96  (12.4) |
| **Crane Operator** | 511 | 107  (20.9) | 47  (9.2) | 41  (8.0) | 24  (4.7) | 10  (2.0) | 46  (9.0) | 25  (4.9) | 40  (7.8) | 34  (6.7) | 42  (8.2) |
| **Concrete Worker** | 397 | 98  (24.7) | 42  (10.6) | 45  (11.3) | 29  (7.3) | 21  (5.3) | 39  (9.8) | 35  (8.8) | 46  (11.6) | 24  (6.0) | 37  (9.3) |
| **Installer** | 241 | 64  (26.6) | 23  (9.5) | 27  (11.2) | 18  (7.5) | 10  (4.1) | 30  (12.4) | 15  (6.2) | 25  (10.4) | 20  (8.3) | 24  (10.0) |
| **Painter** | 149 | 38  (25.5) | 20  (13.4) | 12  (8.1) | 10  (6.7) | 6  (4.0) | 13  (8.7) | 12  (8.1) | 12  (8.1) | 5  (3.4) | 7  (4.7) |
| **Construction Vehicle Driver** | 144 | 35  (24.3) | 28  (19.4) | 16  (11.1) | 12  (8.3) | 2  (1.4) | 22  (15.3) | 9  (6.3) | 13  (9.0) | 7  (4.9) | 5  (3.5) |
| **Other** | 516 | 121  (23.4) | 45  (8.7) | 40  (7.8) | 33  (6.4) | 16  (3.1) | 56  (10.9) | 33  (6.4) | 37  (7.2) | 32  (6.2) | 27  (5.2) |

**Continued Table S2 The prevalence of WMSDs among various construction workers [Number (Prevalence, %)]**

| **Job type** | **Number** | **Overall** | **Neck** | **Shoulder** | **Upper back** | **Elbow** | **Lower back** | **Hand/Wrist** | **Thigh/Leg** | **Knee** | **Angle/**  **Foot** |
| --- | --- | --- | --- | --- | --- | --- | --- | --- | --- | --- | --- |
| **Total** | 10781 | 2952  (27.4) | 1112  (10.3) | 1145  (10.6) | 707  (6.6) | 427  (4.0) | 1122  (10.4) | 976  (9.1) | 988  (9.2) | 703  (6.5) | 1088  (10.1) |
| ***χ2*** |  | 66.486 | 63.045 | 35.665 | 17.846 | 14.999 | 46.386 | 27.819 | 24.792 | 36.567 | 60.793 |
| ***P*** |  | <0.001 | <0.001 | <0.001 | 0.085 | 0.183 | <0.001 | 0.003 | 0.010 | <0.001 | <0.001 |

**Table S3 The key postural angles of different body parts in different tasks [*M* (*P*25 ~ *P*75)]**

| **Posture** | **Rebar Tying** | **Wood Processing** | **Welding** | **Grinding** |
| --- | --- | --- | --- | --- |
| **Neck Flexion/Extension** | 18.4  (11.0-24.2) | 18.9  (13.3-27.7) | 22.1  (15.3-27.2) | 24.0  (17.5-29.1) |
| **Trunk Flexion/Extension** | 28.0  (6.0-40.6) | 32.2  (19.5-52.4) | 38.1  (24.2-50.0) | 32.3  (19.8-46.7) |
| **Upper Arm Forward Flexion/Extension** | 60.0  (36.9-79.5) | 41.9  (24.0-65.4) | 45.0  (24.8-58.2) | 43.2  (25.1-58.4) |
| **Forearm Flexion** | 50.9  (32.3-75.7) | 37.1  (22.9-57.9) | 75.4  (54.1-104.4) | 70.2  (39.5-86.0) |
| **Knee Flexion** | 101.1 (21.9-148.4) | 23.9  (13.6-90.1) | 109.8  (32.9-136.0) | 110.1  (20.3-133.7) |

**Table S4 The distribution of posture risk scores for different tasks in RULA**

| **Group** | **Score** | **Rebar Tying** | **Wood Processing** | **Welding** | **Grinding** | ***H*** | ***P*** |
| --- | --- | --- | --- | --- | --- | --- | --- |
| **Upper arm** | 1 | 3(5.0%) | 6(10.0%) | 3(6.0%) | 7(14.0%) | 3.771 | 0.287 |
| 2 | 12(20.0%) | 17(28.3%) | 12(24.0%) | 13(26.0%) |
| 3 | 25(41.7%) | 25(41.7%) | 21(42.0%) | 17(34.0%) |
| 4 | 20(33.3%) | 10(16.7%) | 12(24.0%) | 13(26.0%) |
| 5 | - | 2(3.3%) | 2(4.0%) | - |
| **Lower arm** | 1 | 13(21.7%) | 2(3.3%) | 9(18.0%) | 10(20.0%) | 20.733 | <0.001 |
| 2 | 27(45.0%) | 31(51.7%) | 33(66.0%) | 35(70.0%) |
| 3 | 20(33.3%) | 27(45.0%) | 8(16.0%) | 5(10.0%) |
| **Wrist bend** | 1 | - | - | - | - | 66.220 | <0.001 |
| 2 | 9(15.0%) | 45(75.0%) | 38(76.0%) | 35(68.6%) |
| 3 | 45(75.0%) | 15(25.0%) | 12(24.0%) | 15(31.4%) |
| 4 | 6(10.0%) | 0(0%) | 0(0.0%) | 3(6.0%) |
| **Wrist twist** | 1 | 32(53.3%) | 52(86.7%) | 41(82.0%) | 45(90.0%) | 27.716 | <0.001 |
| 2 | 28(46.7%) | 8(13.3%) | 9(18.0%) | 5(10.0%) |
| **Muscle use** | 1 | 2(3.3%) | 41(68.3%) | - | - | 124.573 | <0.001 |
| 2 | 58(96.7%) | 19(31.7%) | 50(100.0%) | 50(100.0%) |
| **Add force/load** | 0 | - | 23(38.3%) | - | - | 174.817 | <0.001 |
| 1 | 60(100.0%) | 31(51.7%) | 50(100.0%) | 2(4.0%) |
| 2 | - | 6(10.0%) | - | 48(96.0%) |
| **Wrist & Arm Score** | 1 | - | - | - | - |  |  |
| 2 | - | - | - | - |
| 3 | - | 11(18.3) | - | - |
| 4 | - | 14(23.3) | 2(4.0%) | - |

**Continued Table S4 The distribution of posture risk scores for different tasks in RULA**

| **Group** | **Score** | **Rebar Tying** | **Wood Processing** | **Welding** | **Grinding** | ***H*** | ***P*** |
| --- | --- | --- | --- | --- | --- | --- | --- |
| **Wrist & Arm Score** | 5 | - | 13(21.6) | 10(20.0%) | 7(14.0%) | 120.559 | <0.001 |
| 6 | 7(11.7) | 19(31.6) | 35(70.0%) | 14(28.0%) |
| 7 | 18(63.3) | 3(5.0) | 1(2.0%) | 27(54.0%) |
| 8 | 35(25.0) | - | 1(2.0%) | 2(4.0%) |
| 9 | - | - | 1(2.0%) | - |
| **Neck** | 1 | 2(3.3%) | 1(1.7%) | 1(2.0%) | 3(6.0%) | 0.985 | 0.805 |
| 2 | 11(18.3%) | 12(20.0%) | 7(14.0%) | 6(12.0%) |
| 3 | 27(45.0%) | 29(48.3%) | 24(48.0%) | 20(40.0%) |
| 4 | 16(26.7%) | 16(26.7%) | 18(36.0%) | 21(42.0%) |
| 5 | 4(6.7%) | 2(3.3%) | - | - |
| **Trunk** | 1 | - | - | - | - | 0.943 | 0.815 |
| 2 | 16(26.7%) | 14(23.3%) | 7(14.0%) | 11(22.0%) |
| 3 | 26(43.3%) | 26(43.3%) | 31(62.0%) | 21(42.0%) |
| 4 | 18(30.0%) | 18(30.0%) | 10(20.0%) | 17(34.0%) |
| 5 | - | 2(3.3%) | 2(4.0%) | 1(2.0%) |
| **Leg** | 1 | 56(93.3%) | 60(100.0%) | 50(100.0%) | 50(100.0%) | 10.815 | 0.013 |
| 2 | 4(6.7%) | - | - | - |
| **Muscle use** | 0 | 2(3.3%) | 22(36.7%) | - | 3(6.0%) | 49.103 | <0.001 |
| 1 | 58(96.7%) | 38(63.3%) | 50(100.0%) | 47(94.0%) |
| **Add force/load** | 0 | 60(100.0%) | 60(100.0%) | 50(100.0%) | 50(100.0%) | <0.001 | 1.000 |
| 1 | - | - | - | - |
| **Neck, trunk, leg score** | 1 | - | - | - | - |  |  |
| 2 | - | 1(1.6%) | - | - |
| 3 | 4(6.6%) | 3(5.0%) | 2(4.0%) | 5(10.0%) |

**Continued Table S4 The distribution of posture risk scores for different tasks in RULA**

| **Group** | **Score** | **Rebar Tying** | **Wood Processing** | **Welding** | **Grinding** | ***H*** | ***P*** |
| --- | --- | --- | --- | --- | --- | --- | --- |
| **Neck, trunk, leg score** | 4 | 7(11.6%) | 12(20.0%) | 1(2.0%) | 3(6.0%) | 5.500 | 0.139 |
| 5 | 20(33.3%) | 22(36.6%) | 23(46.0%) | 13(26.0%) |
| 6 | 11(18.3%) | 7(11.6%) | 9(18.0%) | 9(18.0%) |
| 7 | 8(13.3%) | 11(18.3%) | 9(18.0%) | 11(22.0%) |
| 8 | 9(15.0%) | 4(6.6%) | 6(12.0%) | 9(18.0%) |
| 9 | 1(1.6%) | - | - | - |  |  |
| **RULA score** | 1 | - | - | - | - | 49.299 | <0.001 |
| 2 | - | 12(20.0%) | 2(4.0%) | 2(4.0%) |
| 3 | 13(21.7%) | 33(55.0%) | 24(48.0%) | 9(18.0%) |
| 4 | 47(78.3%) | 15(25.0%) | 24(48.0%) | 39(78.0%) |

**Table S5 The distribution of posture risk scores for different tasks in REBA**

| **Group** | **Score** | **Rebar Tying** | **Wood Processing** | **Welding** | **Grinding** | ***H*** | ***P*** |
| --- | --- | --- | --- | --- | --- | --- | --- |
| **Neck** | 1 | 5(8.3%) | 13(21.7%) | 7(14.0%) | 7(14.0%) | 7.496 | 0.058 |
| 2 | 39(65.0%) | 35(58.3%) | 22(44.0%) | 23(46.0%) |
| 3 | 16(26.7%) | 12(20.0%) | 21(42.0%) | 20(40.0%) |
| **Trunk** | 1 | - | - | - | - | 0.943 | 0.815 |
| 2 | 16(26.7%) | 14(23.3%) | 7(14.0%) | 10(20.0%) |
| 3 | 27(45.0%) | 26(43.3%) | 30(60.0%) | 23(46.0%) |
| 4 | 17(28.3%) | 18(30.0%) | 11(22.0%) | 16(32.0%) |
| 5 | - | 2(3.3%) | 2(4.0%) | 1(2.0%) |
| **Leg** | 1 | 20(33.3%) | 38(63.3%) | 22(44.0%) | 30(60.0%) | 15.701 | 0.001 |
| 2 | 9(15.0%) | 8(13.3%) | 5(10.0%) | 4(8.0%) |
| 3 | 30(50.0%) | 14(23.3%) | 23(46.0%) | 16(32.0%) |
| 4 | 1(1.7%) | - | - | - |
| **Force/Load** | 0 | 60(100.0%) | 60(100.0%) | 50(100.0%) | 50(100.0%) | <0.001 | 1.000 |
| 1 | - | - | - | - |
| **Score A** | 1 | - | - | - | - | 10.087 | 0.018 |
| 2 | 2(3.3%) | 3(5.0%) | 3(6.0%) | 3(6.0%) |
| 3 | 4(6.6%) | 11(18.3%) | 2(4.0%) | 2(4.0%) |
| 4 | 10(16.6%) | 13(21.6%) | 7(14.0%) | 7(14.0%) |
| 5 | 12(20.0%) | 9(15.0%) | 10(20.0%) | 10(20.0%) |
| 6 | 19(31.6%) | 8(13.3%) | 18(36.0%) | 18(36.0%) |
| 7 | 9(15.0%) | 8(13.3%) | 7(14.0%) | 7(14.0%) |
| 8 | 4(6.6%) | 5(8.3%) | 1(2.0%) | 1(2.0%) |
| 9 | 0(4.0%) | 3(5.0%) | 2(4.0%) | 2(4.0%) |

**Continued Table S5 The distribution of posture risk scores for different tasks in REBA**

| **Group** | **Score** | **Rebar Tying** | **Wood Processing** | **Welding** | **Grinding** | *H* | *P* |
| --- | --- | --- | --- | --- | --- | --- | --- |
| **Upper Arm** | 1 | 3(5.0%) | 6(10.0%) | 3(6.0%) | 7(14.0%) | 2.415 | 0.491 |
| 2 | 12(20.0%) | 17(28.3%) | 12(24.0%) | 15(30.0%) |
| 3 | 31(51.7%) | 26(43.3%) | 23(46.0%) | 15(30.0%) |
| 4 | 14(23.3%) | 10(16.7%) | 12(24.0%) | 13(26.0%) |
| 5 | - | 1(1.7%) | - | - |
| **Lower Arm** | 1 | 16(26.7%) | 14(23.3%) | 16(32.0%) | 24(48.0%) | 4.685 | 0.196 |
| 2 | 44(73.3%) | 46(76.7%) | 34(68.0%) | 26(52.0%) |
| **Wrist** | 1 | - | 17(28.3%) | 7(14.0%) | 8(16.0%) | 35.505 | <0.001 |
| 2 | 52(86.7%) | 38(63.3%) | 37(74.0%) | 31(62.0%) |
| 3 | 8(13.3%) | 5(8.3%) | 6(12.0%) | 11(22.0%) |
| **Coupling** | 0 | 60(100.0%) | 20(33.3%) | 42(84.0%) | - | 121.597 | <0.001 |
| 1 | - | 33(55.0%) | 8(16.0%) | 50(100.0%) |
| 2 | - | 7(11.7%) | - | - |
| **Score B** | 1 | - | - | - | - | 5.796 | 0.122 |
| 2 | 1(1.6%) | 1(1.6%) | 1(2.0%) | 1(2.0%) |
| 3 | 7(11.6%) | 9(15.0%) | 6(12.0%) | 6(12.0%) |
| 4 | 7(11.6%) | 10(16.6%) | 9(18.0%) | 9(18.0%) |
| 5 | 35(58.3%) | 14(23.3%) | 21(42.0%) | 21(42.0%) |
| 6 | - | 11(18.3%) | 5(6.0%) | 5(10.0%) |
| 7 | 10(16.6%) | 10(16.6%) | 8(16.0%) | 8(16.0%) |
| 8 | - | 4(6.6%) | - | - |
| 9 | - | 1(1.6%) | - | - |

**Continued Table S5 The distribution of posture risk scores for different tasks in REBA**

| **Group** | | **Score** | **Rebar Tying** | **Wood Processing** | **Welding** | **Grinding** | *H* | *P* |
| --- | --- | --- | --- | --- | --- | --- | --- | --- |
| **Activity** | 0 | - | 14(23.3%) | - | - | 102.460 | <0.001 | |
| 1 | 4(6.7%) | 32(53.3%) | - | 2(4.0%) |
| 2 | 56(93.3%) | 10(16.7%) | 50(100.0%) | 48(96.0%) |
| 3 | - | 4(6.7%) | - | - |
| **REBA Score** | 1 | - | - | - | - | 21.595 | <0.001 | |
| 2 | 17(28.3%) | 32(53.3%) | 12(24.0%) | 11(22.0%) |
| 3 | 33(55.0%) | 19(31.7%) | 27(54.0%) | 19(38.0%) |
| 4 | 10(16.7%) | 9(15.0%) | 11(22.0%) | 20(40.0%) |

**Table S6 The distribution of posture risk scores for different tasks in OWAS**

| **Group** | **Score** | **Rebar Tying** | **Wood Processing** | **Welding** | **Grinding** | *H* | *P* |
| --- | --- | --- | --- | --- | --- | --- | --- |
| **Trunk** | 1 | 21(35.0%) | 14(23.3%) | 10(20.0%) | 12(24.0%) | 1.237 | 0.744 |
| 2 | 33(55.0%) | 42(70.0%) | 38(76.0%) | 35(70.0%) |
| 3 | 3(5.0%) | 1(1.7%) | 2(4.0%) | 1(2.0%) |
| 4 | 3(5.0%) | 3(5.0%) | - | 2(4.0%) |
| **Arm** | 1 | 51(85.0%) | 58(96.7%) | 47(94.0%) | 46(92.0%) | 7.573 | 0.056 |
| 2 | 9(15.0%) | 2(3.3%) | 3(6.0%) | 4(8.0%) |
| 3 | - | - | - | - |
| **Leg** | 1 | 1(1.7%) | 4(6.7%) | 12(24.0%) | 16(32.0%) | 16.552 | 0.001 |
| 2 | 24(40.0%) | 27(45.0%) | 14(28.0%) | 19(38.0%) |
| 3 | 4(6.7%) | 1(1.7%) | - | - |
| 4 | 20(33.3%) | 9(15.0%) | 16(32.0%) | 13(26.0%) |
| 5 | 11(18.3%) | 4(6.7%) | 8(16.0%) | 2(4.0%) |
| 6 | - | - | - | - |
| 7 | - | 15(25.0%) | - | - |
| **Lifting heavy objects with hands** | 1 | 60(100.0%) | 54(90.0%) | 50(100.0%) | 50(100.0%) | 16.374 | 0.001 |
| 2 | - | 6(10.0%) | - | - |
| 3 | - | - | - | - |
| **OWAS Score** | 1 | 19(31.7%) | 15(25.0%) | 8(16.0%) | 12(24.0%) | 15.179 | 0.002 |
| 2 | 15(25.0%) | 28(46.7%) | 20(40.0%) | 23(46.0%) |
| 3 | 24(40.0%) | 17(28.3%) | 20(40.0%) | 15(30.0%) |
| 4 | 2(3.3%) | - | 2(4.0%) | - |

**Table S7 Differences in overall risk level for each task between different methods**

|  | **Risk level difference** | **Total** | **Rebar Tying** | **Wood Processing** | **Welding** | **Grinding** |
| --- | --- | --- | --- | --- | --- | --- |
| **RULA-REBA** | -1 | 6(2.7%) | - | 4(6.7%) | 2(4.0%) | - |
| 0 | 103(46.8%) | 17(28.3%) | 29(48.3%) | 29(57.9%) | 28(56.0%) |
| 1 | 96(43.6%) | 35(58.4%) | 26(43.3%) | 14(28.0%) | 21(42.0%) |
| 2 | 15(6.8%) | 8(13.3%) | 1(1.7%) | 5(10.0%) | 1(2.0%) |
| 3 | - | - | - | - | - |
| **RULA-OWAS** | -1 | - | - | - | - | - |
| 0 | 32(14.5%) | 4(6.7%) | 12(20.0%) | 16(32.0%) | - |
| 1 | 95(43.2%) | 24(40.0%) | 35(58.3%) | 16(32.0%) | 20(40.0%) |
| 2 | 75(34.1%) | 22(36.6%) | 13(21.7%) | 14(28.0%) | 26(52.0%) |
| 3 | 18(8.2%) | 10(16.7%) | - | 4(8.0%) | 4(8.0%) |
| **REBA-OWAS** | -1 | 2(0.9%) | 1(1.6%) | 1(1.7%) | - | - |
| 0 | 62(28.2%) | 15(25.0%) | 23(38.3%) | 22(44.0%) | 2(4.0%) |
| 1 | 132(60.0%) | 40(66.7%) | 34(56.7%) | 22(44.0%) | 36(72.0%) |
| 2 | 23(10.4%) | 4(6.7%) | 2(3.3%) | 6(12.0%) | 11(22.0%) |
| 3 | 1(0.5%) | - | - | - | 1(2.0%) |

Note: The term "risk level difference" for RULA-REBA, RULA-OWAS, and REBA-OWAS comparisons refers to the numerical value obtained by subtracting the risk level assigned by the latter method from that assigned by the former method.

**Table S8 Results of consistency tests on overall risk levels for each task between different methods**

| **Task** | **Comparison group** | **Kappa (κ)** | **Standard error** | ***Z*** | ***P*** | **95% *CI*** |
| --- | --- | --- | --- | --- | --- | --- |
| **Total** | RULA-REBA | 0.318 | 0.040 | 7.827 | <0.001 | 0.240 ~ 0.396 |
| RULA-OWAS | 0.044 | 0.012 | 3.171 | 0.002 | 0.021 ~ 0.068 |
| REBA-OWAS | 0.229 | 0.026 | 7.648 | <0.001 | 0.177 ~ 0.280 |
| **Rebar Tying** | RULA-REBA | 0.099 | 0.033 | 2.143 | 0.032 | 0.035 ~ 0.164 |
| RULA-OWAS | 0.009 | 0.006 | 0.756 | 0.449 | -0.004 ~ 0.021 |
| REBA-OWAS | 0.245 | 0.050 | 4.266 | <0.001 | 0.146 ~ 0.343 |
| **Wood Processing** | RULA-REBA | 0.373 | 0.077 | 4.497 | <0.001 | 0.221 ~ 0.524 |
| RULA-OWAS | 0.320 | 0.060 | 5.344 | <0.001 | 0.202 ~ 0.437 |
| REBA-OWAS | 0.297 | 0.055 | 4.541 | <0.001 | 0.189 ~ 0.405 |
| **Welding** | RULA-REBA | 0.324 | 0.095 | 3.664 | <0.001 | 0.138 ~ 0.511 |
| RULA-OWAS | 0.064 | 0.033 | 1.925 | 0.054 | -0.001 ~ 0.130 |
| REBA-OWAS | 0.298 | 0.068 | 4.234 | <0.001 | 0.165 ~ 0.430 |
| **Grinding** | RULA-REBA | 0.374 | 0.084 | 4.150 | <0.001 | 0.211 ~ 0.538 |
| RULA-OWAS | 0.014 | 0.010 | 0.945 | 0.345 | -0.006 ~ 0.034 |
| REBA-OWAS | 0.090 | 0.027 | 2.315 | 0.021 | 0.036 ~ 0.143 |

**Table S9 Comparison of overall risk levels for each task between different methods**

|  | **Total** | **Rebar Tying** | **Wood Processing** | **Welding** | **Grinding** |
| --- | --- | --- | --- | --- | --- |
| **Mean Rank of RULA** | 457.17a, b | 135.53a, b | 118.48a, b | 101.12a, b | 106.17a, b |
| **Mean Rank of REBA** | 341.49b, c | 84.95b, c | 92.56b, c | 78.52b, c | 84.72b, c |
| **Mean Rank of OWAS** | 192.85a, c | 51.03a, c | 60.07a, c | 47.36a, c | 35.61a, c |
| *χ²* | 226.031 | 88.720 | 42.991 | 36.343 | 77.560 |
| *P* | <0.001 | <0.001 | <0.001 | <0.001 | <0.001 |

Note: Within the same column, post hoc pairwise comparisons were performed using Dunn's test.

1. Significantly different compared to REBA mean rank (P < 0.017);
2. Significantly different compared to OWAS mean rank (P < 0.017);
3. Significantly different compared to RULA mean rank (P < 0.017).

**
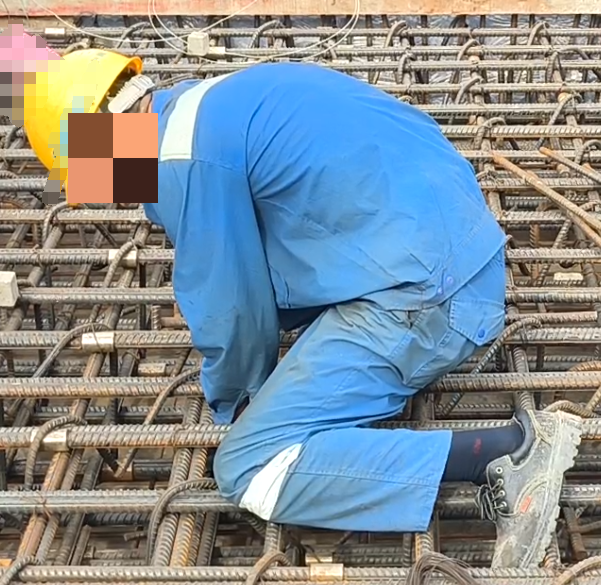
**

**Figure S1 Diagram of rebar tying operations**


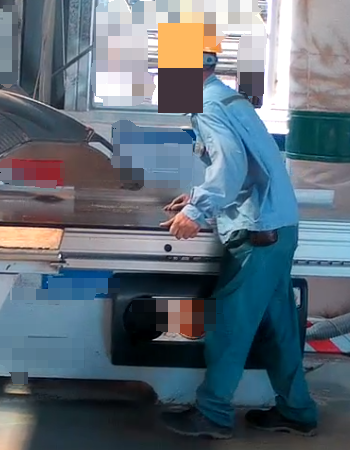


**Figure S2 Diagram of wood processing operations**


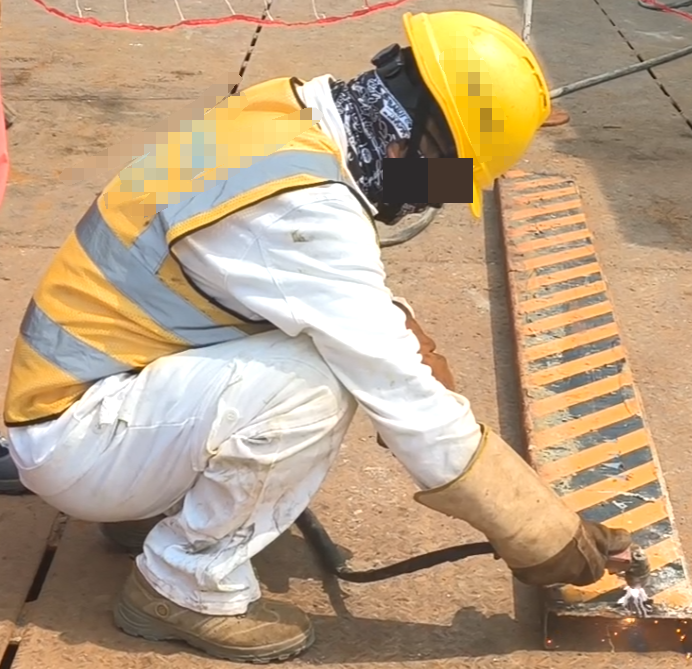


**Figure S3 Diagram of welding operations**


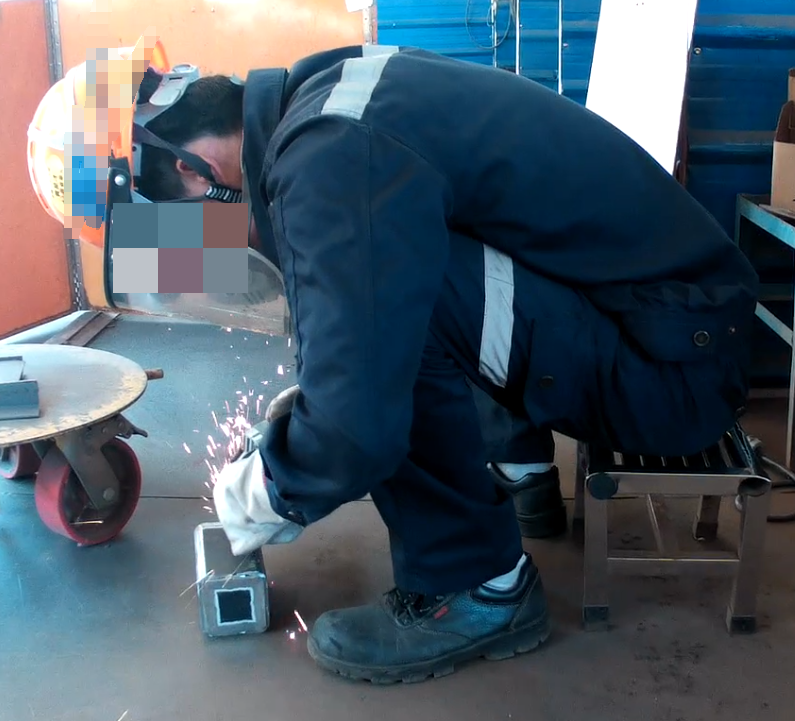


**Figure S4 Diagram of grinding operations**
